- in Cardiac Interventions: The logistic EuroSCORE in cardiac surgery: How well does it predict operative risk? *Heart* 2006; 92:1817–20
23. Ad N, Barnett SD, Speir AM: The performance of the EuroSCORE and the Society of Thoracic Surgeons mortality risk score: The gender factor. *Interact Cardiovasc Thorac Surg* 2006; 6:192–5
  24. Reponen E, Tuominen H, Korja M: Evidence for the use of preoperative risk assessment scores in elective cranial neurosurgery. *Anesth Analg* 2014; 119:420–32
  25. Sacko O, Sesay M, Roux FE, Riem T, Grenier B, Liguoro D, Loiseau H: Intracranial meningioma surgery in the ninth decade of life. *Neurosurgery* 2007; 61:950–4
  26. Lee TH, Marcantonio ER, Mangione CM, Thomas EJ, Polanczyk CA, Cook EF, Sugarbaker DJ, Donaldson MC, Poss R, Ho KK, Ludwig LE, Pedan A, Goldman L: Derivation and prospective validation of a simple index for prediction of cardiac risk of major noncardiac surgery. *Circulation* 1999; 100:1043–9
  27. McDonagh DL, Berger M, Mathew JP, Graffagnino C, Milano CA, Newman MF: Neurological complications of cardiac surgery. *Lancet Neurol* 2014; 13:490–502

### Appendix: Collaborators of the Société Française d'Anesthésie-Réanimation (SFAR) Research Network

Marie-Pierre Bonnet, M.D., Ph.D., Anesthesia and Critical Care Department, Hôpital Cochin, Paris, France; Morgan Le Guen, M.D., Ph.D., Anesthesia and Critical Care Department, Hôpital Foch, Suresnes, France; Valeria Martinez, M.D., Anesthesia and Critical Care Department, Hôpital Raymond Poincaré, Garches, France; and Romain Pirracchio, M.D., Ph.D. and Amélie Yavchitz, M.D., Anesthesia and Critical Care Department, Hôpital Européen Georges Pompidou, Paris, France.

## ANESTHESIOLOGY REFLECTIONS FROM THE WOOD LIBRARY-MUSEUM

### Daily Nitrous Oxide for “Pupblic” Patients of Dr. C. C. Haskell

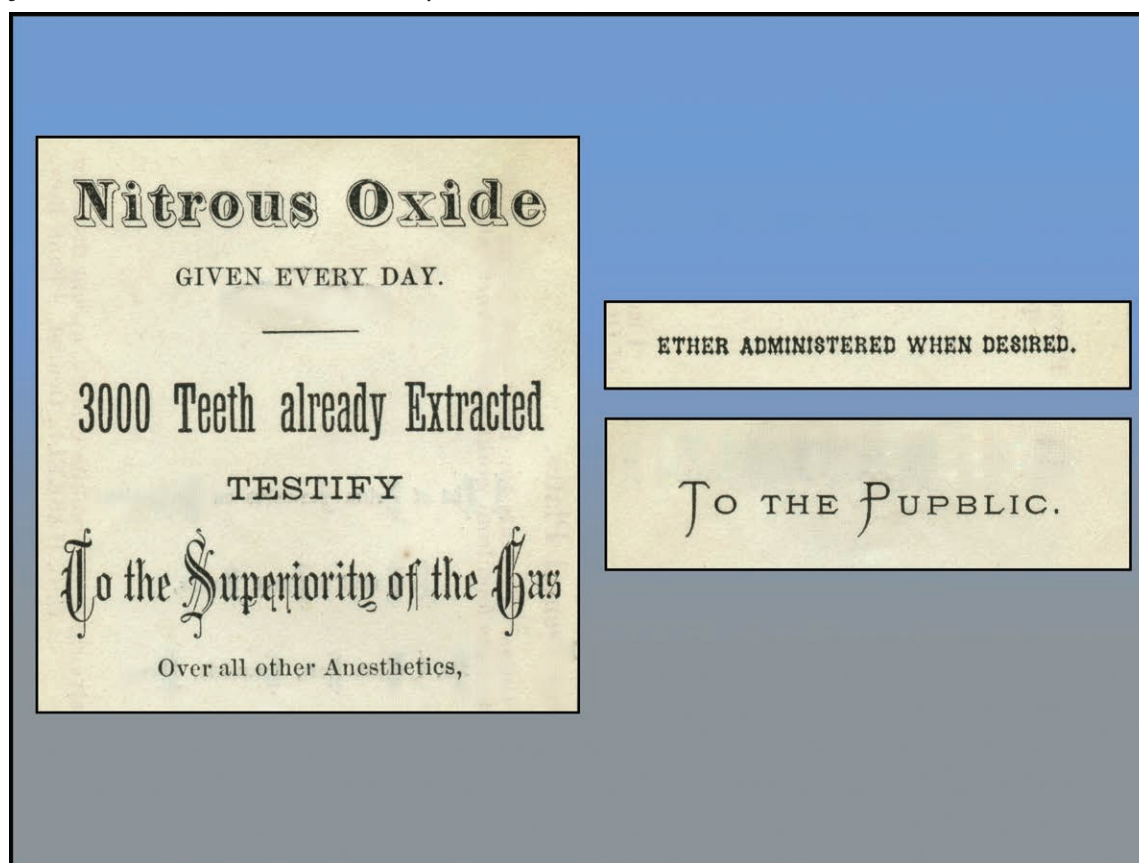

From Springfield, Massachusetts, Dr. Clarence Crowell Haskell (1858 to 1917) published a ca. 1870 pamphlet advertising (left) that he administered nitrous oxide “every day.” By touting that “3000 teeth already extracted testify to the superiority of the gas over all other anesthetics,” Dr. Haskell was mimicking pioneer anesthetist G. Q. Colton, who had advertised his own revival of nitrous-oxide anesthesia. With Haskell’s slogan (upper right), “Ether administered when desired,” he afforded an alternate anesthetic for those not happy to receive laughing gas. “Pupblic” patients (lower right) could only pray that Dr. Haskell could administer anesthetics better than he could spell or proofread.... (Copyright © the American Society of Anesthesiologists’ Wood Library-Museum of Anesthesiology.)

George S. Bause, M.D., M.P.H., Honorary Curator and Laureate of the History of Anesthesia, Wood Library-Museum of Anesthesiology, Schaumburg, Illinois, and Clinical Associate Professor, Case Western Reserve University, Cleveland, Ohio. UJYC@aol.com.
